# Supplementary material for: Linking Micropollutants to Trait Syndromes across Freshwater Diatom, Macroinvertebrate, and Fish Assemblages
Source: MDPI journal article supplement (doi:10.3390/w14081184), 2022-04-07
Supplement: s1 [file s1]

Archive with 2 entries (2 files):
- MatSup_Tables_20220329.xlsx
- syndrome_MatSup_Figure_20220329.pdf
