# Supplementary material for: Linking Micropollutants to Trait Syndromes across Freshwater Diatom, Macroinvertebrate, and Fish Assemblages
Source: MDPI journal article supplement (doi:10.3390/w14081184), 2022-04-07
Supplement: s1 [file s1 › MatSup_Tables_20220329.xlsx]

## Sheet: Table S1
Trait	Trait category	Description
Attachment	never	life form 3
Attachment	possible	life form 3
Colony	no	life form 4
Colony	mucus	life form 4
Colony	zigzag	life form 4
Colony	ribon	life form 4
Colony	star	life form 4
Colony	arbuscular	life form 4
Guild	high	ecological guild
Guild	low	ecological guild
Guild	motile	ecological guild
Guild	euplanktonic	ecological guild
Life form	planktonic	life form 1
Life form	benthic	life form 1
Metabolism	N_auto1	nitrogen uptake metabolism
Metabolism	N_auto2	nitrogen uptake metabolism
Metabolism	N_hetero1	nitrogen uptake metabolism
Metabolism	N_hetero2	nitrogen uptake metabolism
Mobility	yes	life form 2
Mobility	no	life form 2
Morphology	centrics	morphology
Morphology	araphids	morphology
Morphology	monoraphids	morphology
Morphology	biraphids	morphology
Oxygen	high	oxygen requirements
Oxygen	fairly_high	oxygen requirements
Oxygen	moderate	oxygen requirements
Oxygen	low	oxygen requirements
Oxygen	very_low	oxygen requirements
pH	acidobiontic	pH affinity
pH	acidophilous	pH affinity
pH	neutrophilous	pH affinity
pH	alkaliphilous	pH affinity
pH	alkalibiontic	pH affinity
pH	indifferent	pH affinity
Salinity	fresh	salinity affinity
Salinity	fresh-brackish	salinity affinity
Salinity	brackish-fresh	salinity affinity
Salinity	brackish	salinity affinity
Saprobity	oligo	saprobity affinity
Saprobity	bmeso	saprobity affinity
Saprobity	ameso	saprobity affinity
Saprobity	ameso/poly	saprobity affinity
Saprobity	poly	saprobity affinity
Size	Cl1	size
Size	Cl2	size
Size	Cl3	size
Size	Cl4	size
Size	Cl5	size
Size	Cl6	size
Size	Cl7	size
Trophy	oligo	trophic state affinity
Trophy	oligo/meso	trophic state affinity
Trophy	meso	trophic state affinity
Trophy	meso/eutro	trophic state affinity
Trophy	eutro	trophic state affinity
Trophy	hypereutro	trophic state affinity
Trophy	indifferent	trophic state affinity

## Sheet: Table S2
Trait label	Trait category	Trait extended description
Aquatic stages	egg	Aquatic stages
Aquatic stages	larva	Aquatic stages
Aquatic stages	nymph	Aquatic stages
Aquatic stages	adult	Aquatic stages
Current	null	Current velocity preferences
Current	slow	Current velocity preferences
Current	medium	Current velocity preferences
Current	fast	Current velocity preferences
Dispersal	aquatic, passive	Dispersal technique
Dispersal	aquatic, active	Dispersal technique
Dispersal	aerial, passive	Dispersal technique
Dispersal	aerial, active	Dispersal technique
Dissemination	< 10 m	Dissemination potential in the water
Dissemination	> 10-100 m	Dissemination potential in the water
Dissemination	> 100-1000 m	Dissemination potential in the water
Dissemination	> 1000-10000 m	Dissemination potential in the water
Dissemination	> 10000 m	Dissemination potential in the water with ships as vector
Fecundity	< 100	Fecundity
Fecundity	> 100-1000	Fecundity
Fecundity	> 1000-3000	Fecundity
Fecundity	> 3000	Fecundity
Feeding	deposit feeder	Feeding habits
Feeding	shredder	Feeding habits
Feeding	scraper	Feeding habits
Feeding	filter-feeder	Feeding habits
Feeding	piercer	Feeding habits
Feeding	predator	Feeding habits
Feeding	parasite	Feeding habits
Flexibility	< 10°	Body flexibility
Flexibility	> 10-45°	Body flexibility
Flexibility	> 45°	Body flexibility
Food	fine detritus	Food types
Food	dead plant	Food types
Food	microphytes	Food types
Food	macrophytes	Food types
Food	dead animal	Food types
Food	microinvertebrates	Food types
Food	large animals	Food types
Form	cylindrical	Body form
Form	flattened	Body form
Form	spherical	Body form
Form	streamlined	Body form
Life span	≤ 1 year	Life span
Life span	> 1 year	Life span
Locomotion	flier	Locomotion techniques
Locomotion	swimmer	Locomotion techniques
Locomotion	crawler	Locomotion techniques
Locomotion	burrower	Locomotion techniques
Locomotion	interstitial	Locomotion techniques
Locomotion	attached	Locomotion techniques
Molting	0	Number of molting events
Molting	1	Number of molting events
Molting	2-4	Number of molting events
Molting	[5-10[	Number of molting events
Molting	[10-15[	Number of molting events
Molting	[15-20[	Number of molting events
Molting	> 20	Number of molting events
pH	< 4	Low pH tolerance
pH	> 4-4.5	Low pH tolerance
pH	> 4.5-5	Low pH tolerance
pH	> 5-5.5	Low pH tolerance
pH	> 5.5-6	Low pH tolerance
pH	> 6	Low pH tolerance
Repro.cycles	1	Number of reproductive cycles per individual
Repro.cycles	2	Number of reproductive cycles per individual
Repro.cycles	> 2-6	Number of reproductive cycles per individual
Repro.cycles	> 6	Number of reproductive cycles per individual
Repro.strat	ovoviviparity	Reproduction strategy
Repro.strat	eggs, free	Reproduction strategy
Repro.strat	eggs, cemented	Reproduction strategy
Repro.strat	clutches, cemented	Reproduction strategy
Repro.strat	clutches, free	Reproduction strategy
Repro.strat	clutches, terrestrial	Reproduction strategy
Repro.strat	asexual	Reproduction strategy
Repro.tech	hermaphrodism	Reproductive techniques
Repro.tech	male and female	Reproductive techniques
Repro.tech	single individual	Reproductive techniques
Resistance	eggs	Resistance forms
Resistance	cocoons	Resistance forms
Resistance	diapause	Resistance forms
Resistance	none	Resistance forms
Respiration	tegument	Respiration techniques
Respiration	gill	Respiration techniques
Respiration	plastron, spiracle	Respiration techniques
Salinity	fresh	Salinity preferences
Salinity	brackish	Salinity preferences
Saprobity	xenosaprobic	Saprobity
Saprobity	oligosaprobic	Saprobity
Saprobity	β-mesosaprobic	Saprobity
Saprobity	α-mesosaprobic	Saprobity
Saprobity	polysaprobic	Saprobity
Size	< 0.5 cm	Maximal potential size
Size	0.5-1 cm	Maximal potential size
Size	1-2 cm	Maximal potential size
Size	2-4 cm	Maximal potential size
Size	> 4 cm	Maximal potential size
Substrate	> pebbles	Substrate preferences
Substrate	gravel	Substrate preferences
Substrate	sand	Substrate preferences
Substrate	silt	Substrate preferences
Substrate	macrophytes	Substrate preferences
Substrate	microphytes	Substrate preferences
Substrate	roots	Substrate preferences
Substrate	litter	Substrate preferences
Substrate	mud	Substrate preferences
Temperature	psychrophilic	Temperature preferences
Temperature	thermophilic	Temperature preferences
Temperature	eurythermic	Temperature preferences
Trophy	oligotrophic	Trophic status preferences
Trophy	mesotrophic	Trophic status preferences
Trophy	eutrophic	Trophic status preferences
Voltinism	< 1 gen/yr	Semivoltinism
Voltinism	1 gen/yr	Monovoltinism
Voltinism	> 1 gen/yr	Polyvoltinism

## Sheet: Table S3
Trait	Trait category	Description_1	Description_2	Comment
Body form	eel.like	Body form and shape	The body form is much like that of an eel
Body form	elongated.cylindrical	Body form and shape	The body form is elongated and cylindrical
Body form	flat.deep	Body form and shape	The body form is flat and/or deep
Body form	fusiform.streamlined	Body form and shape	The body form is fusiform and/or streamlined
Dispersal	catadrom.anadrom	Migration	Catadromous or anadromous
Dispersal	potamodromous	Migration	Potamodromous capable of migration across large distances within streams
Dispersal	resident	Migration	Resident: does not migrate or just across short distances
Dispersal	resid.potamo	Migration	Migration is in between resident species and potamodromous ones
Dist.against.current	> 0.5-50 m	Distance travelled against current when migrating	> 0.5-50 m
Dist.against.current	> 50-500 m	Distance travelled against current when migrating	> 50-500m
Dist.against.current	> 500-10 km	Distance travelled against current when migrating	> 500m-10km
Dist.with.current	> 5-50 m	Distance travelled with current when migrating	> 5-50m
Dist.with.current	> 50-500 m	Distance travelled with current when migrating	> 50-500m
Dist.with.current	> 500-10000 m	Distance travelled with current when migrating	> 500m-10km
Dist.with.current	> 10 km-100 km	Distance travelled with current when migrating	> 10-100 km
Egg diameter	< 1.1 mm	Egg diameter	< 1.1 mm
Egg diameter	>= 1.1-1.5 mm	Egg diameter	>= 1.1-1.5 mm
Egg diameter	>= 1.5-2.0 mm	Egg diameter	>= 1.5-2.0 mm
Egg diameter	> 2.0 mm	Egg diameter	> 2.0 mm
Fecundity.absol	< 2.4K oocytes	Absolute fecundity	< 2400 nb. Oocytes
Fecundity.absol	>= 2.4K-7.2K oocytes	Absolute fecundity	>= 2400-7200 nb. Oocytes
Fecundity.absol	>= 7.2K-45.0K oocytes	Absolute fecundity	>= 7200-45000 nb. Oocytes
Fecundity.absol	>= 45.0K-65.0K oocytes	Absolute fecundity	>= 45000-65000 nb. Oocytes
Fecundity.absol	>= 65.0K-350.0K oocytes	Absolute fecundity	>= 65000-350000 nb. Oocytes
Fecundity.absol	>= 350.0 K oocytes	Absolute fecundity	>= 350000 nb. Oocytes
Fecundity.relat	< 200 oocytes / g	Relative fecundity	< 200 nb. Oocytes / g
Fecundity.relat	>= 200-600 oocytes / g	Relative fecundity	>= 200-600 nb. Oocytes / g
Fecundity.relat	>= 600 oocytes / g	Relative fecundity	>= 600 nb. Oocytes / g
Feeding group	detritivore	Functional feeding group	Detritivorous: adult diet consists of high proportion of detritus, the digestive tract is unspecialised. Combinations with other modalities are possible.
Feeding group	herbivore	Functional feeding group	Herbivorous: diet of adult fish consists of more than 75% plant material. Fish have terminal or subterminal mouth with bony slashing jaw for clipping and tearing aquatic vegetation. Often the digestive tract is as long or longer than the total length of the individual. Combinations with other modalities are possible.
Feeding group	insectivore	Functional feeding group	Insectivorous: adult diet consists of more than 75% insects. individuals have terminal or supraterminal mouth, take aerial, drifting or swimming insects and invertebrates. The largest and most diverse trophic guild. Combinations with other modalities are possible.
Feeding group	insect.omniv	Functional feeding group	Insectivorous but can feed upon different resources
Feeding group	insect.pisc	Functional feeding group	Insectivorous but can be piscivorous occasionnally
Feeding group	omnivore	Functional feeding group	Omnivorous: adult consists of more than 25% plant material and more than 25% animal material. Generalists.
Feeding group	omniv.insect	Functional feeding group	Omnivorous but tends to be insectivorous
Feeding group	piscivore	Functional feeding group	Piscivorous: other fish represent more than 75% of adults diet. individuals have a wide mouth aperture with needle-like teeth and a strong jaw with marginal and palatal bones. they pursue a prey by stalking, chasing, ambushing or lying-in-wait approach. Combinations with other modalities are possible.
Feeding group	planktivore	Functional feeding group	Planktivorous: adult diet consists of more than 75% zooplankton and/or phytoplankton. fish having fine gill-rakers and elongated pharyngal teeth, they have no stomach but an elongated, undifferentiated intestine. Combinations with other modalities are possible.
Food	animal <= 1 mm	Size classes of resource items	<= 1 mm	Animal size
Food	animal > 1-10 mm	Size classes of resource items	> 1-10 mm	Animal size
Food	animal > 10 mm	Size classes of resource items	> 10 mm	Animal size
Food	detritus <= 1 mm	Size classes of resource items	<= 1 mm	Detritus size: This trait was fuzzy coded with affinities ranging from 0 to 5 in each category
Food	detritus > 1-10 mm	Size classes of resource items	> 1-10 mm	Detritus size: This trait was fuzzy coded with affinities ranging from 0 to 5 in each category
Food	detritus > 10 mm	Size classes of resource items	> 10 mm	Detritus size: This trait was fuzzy coded with affinities ranging from 0 to 5 in each category
Food	plant <= 1 mm	Size classes of resource items	<= 1 mm	Plant size
Food	plant > 1-10 mm	Size classes of resource items	> 1-10 mm	Plant size
Food	plant > 10 mm	Size classes of resource items	> 10 mm	Plant size
Habitat.feeding	benthic	Habitat feeding	Benthic: fish prefer to live near the bottom from where they take food. They usually do not go to the surface for feeding purpose.
Habitat.feeding	pelagic	Habitat feeding	Pelagic: fish live in the open area above the bottom
Habitat.living	benthic	Habitat living	Benthic: fish prefer to live near the bottom.
Habitat.living	benth.pel	Habitat living	Benthopelagic fish
Habitat.living	demersal	Habitat living	Demersal: fish live in the area just above the benthic zone (forms a layer of the larger profundal zone).
Habitat.living	dem.benth	Habitat living	Fish live in the benthic zone but tend to stay near the bottom
Habitat.living	dem.pel	Habitat living	Fish live in the demersal zone but tend to move in the water column
Habitat.living	pelagic	Habitat living	Pelagic: fish live in the open area above the bottom
Habitat.spawning	euryopar	Habitat spawning preference	Euryopar: no clear spawning habitat preferences
Habitat.spawning	limnopar	Habitat spawning preference	Limnopar: preference to spawn in stagnant waters.
Habitat.spawning	rheopar	Habitat spawning preference	Rheopar: preference to spawn in running waters.
ICE.class	no crossing above 0.5 m	ICE class	individuals have trouble crossing small obstacles (weirs, dams) that are < 0.5 m in height; no individuals can cross above 0.5 m
ICE.class	no crossing above 1 m	ICE class	individuals have trouble crossing obstacles that are between 0.5 and 1 m in height; no individuals can cross above 1 m
ICE.class	no crossing above 3 m	ICE class	individuals have trouble crossing obstacles that are between 1 m and 3 m in height; no individuals can cross above 3 m
Incub.period	<= 7 days	Length of incubation period	<= 7 days
Incub.period	> 7-14 days	Length of incubation period	> 7-14 days
Incub.period	> 14 days	Length of incubation period	> 14 days
Larval length	<= 4.2 cm	Larval length	<= 4.2 cm
Larval length	> 4.2-6.3 cm	Larval length	> 4.2-6.3 cm
Larval length	> 6.3 cm	Larval length	> 6.3 cm
Life span	< 8 years	Longevity	< 8 years
Life span	> 8-15 years	Longevity	> 8-15 years
Life span	> 15 years	Longevity	> 15 years
Max.age.maturity	<= 2 years	Maximum age of females at maturity	<= 2 years
Max.age.maturity	> 2-3 years	Maximum age of females at maturity	> 2-3 years
Max.age.maturity	> 3-4 years	Maximum age of females at maturity	> 3-4 years
Max.age.maturity	> 4-5 years	Maximum age of females at maturity	> 4-5 years
Max.age.maturity	>= 5 years	Maximum age of females at maturity	>= 5 years
Max.body.length	<= 12.65 cm	Maximum body size	<= 12.65 cm
Max.body.length	> 12.65-22.80 cm	Maximum body size	> 12.65-22.80 cm
Max.body.length	> 22.80-45.60 cm	Maximum body size	> 22.80-45.60 cm
Max.body.length	> 45.60-91.20 cm	Maximum body size	> 45.60-91.20 cm
Max.body.length	>= 91.20 cm	Maximum body size	>= 91.20 cm
Max.body.weight	< 22 g	Maximum body mass	< 22 g
Max.body.weight	> 22-99 g	Maximum body mass	> 22-99 g
Max.body.weight	> 99-202 g	Maximum body mass	> 99-202 g
Max.body.weight	> 202-1100 g	Maximum body mass	> 202-1100 g
Max.body.weight	> 1100-5100 g	Maximum body mass	> 1100-5100 g
Max.body.weight	>= 5100 g	Maximum body mass	>= 5100 g
Max.growth.param	< 0.24	Maximum parameter of the Von Bertalanffy Growth Function	< 0.24 time-1	expressing the maximum rate at which the asymptotic length (or weight) is approached.
Max.growth.param	> 0.24-0.48	Maximum parameter of the Von Bertalanffy Growth Function	> 0.24-0.48 time-1	expressing the maximum rate at which the asymptotic length (or weight) is approached.
Max.growth.param	> 0.48-0.96	Maximum parameter of the Von Bertalanffy Growth Function	> 0.48-0.96 time-1	expressing the maximum rate at which the asymptotic length (or weight) is approached.
Max.growth.param	>= 0.96	Maximum parameter of the Von Bertalanffy Growth Function	>= 0.96 time-1	expressing the maximum rate at which the asymptotic length (or weight) is approached.
Max.numb.gill.rakers	<= 25	Maximum number of gill rakers	<= 25
Max.numb.gill.rakers	> 25	Maximum number of gill rakers	> 25
Max.speed	< 1-2 m.s-1	Maximum speed	< 1-2 m.s-1
Max.speed	>= 2-3 m.s-1	Maximum speed	>= 2-3 m.s-1
Max.speed	>= 3-4 m.s-1	Maximum speed	>= 3-4 m.s-1
Max.speed	>= 4-7 m.s-1	Maximum speed	>= 4-7 m.s-1
Min.water.height	< 0-5 cm	Minimum water height	< 0-5 cm
Min.water.height	>= 5-15 cm	Minimum water height	>= 5-15 cm
Min.water.height	>= 15-25 cm	Minimum water height	>= 15-25 cm
Parental care	no protection	Parental care	No protection: no protection of eggs or larvae (parental care)
Parental care	protection	Parental care	Protection: protection of eggs and/or larvae, often including some form of parental care (nest or eggs hidden in any manner)
Ratio.body.elong	< 5	Body elongation	< 5	body length/body depth: Hydrodynamism
Ratio.body.elong	>= 5	Body elongation	>= 5	body length/body depth: Hydrodynamism
Ratio.body.lateral.shape	< 0.41	Body lateral shape	< 0.41	head depth / body depth: Hydrodynamism and head size
Ratio.body.lateral.shape	>= 0.41-0.51	Body lateral shape	>= 0.41-0.51	head depth / body depth: Hydrodynamism and head size
Ratio.body.lateral.shape	>= 0.51-0.65	Body lateral shape	>= 0.51-0.65	head depth / body depth: Hydrodynamism and head size
Ratio.body.lateral.shape	>= 0.65	Body lateral shape	>= 0.65	head depth / body depth: Hydrodynamism and head size
Ratio.caudal.throttling	< 2.10	Caudal peduncle throttling	< 2.10	caudal fin depth / caudal peduncle depth: Caudal propulsion efficiency through reduction of drag
Ratio.caudal.throttling	>= 2.10-2.95	Caudal peduncle throttling	>= 2.10-2.95	caudal fin depth / caudal peduncle depth: Caudal propulsion efficiency through reduction of drag
Ratio.caudal.throttling	>= 2.95	Caudal peduncle throttling	>= 2.95	caudal fin depth / caudal peduncle depth: Caudal propulsion efficiency through reduction of drag
Ratio.eye.size	< 0.89	Relative eye size	< 0.89	eye diameter / head depth: Visual acuity
Ratio.eye.size	>= 0.89-1.09	Relative eye size	>= 0.89-1.09	eye diameter / head depth: Visual acuity
Ratio.eye.size	>= 1.09-1.34	Relative eye size	>= 1.09-1.34	eye diameter / head depth: Visual acuity
Ratio.eye.size	>= 1.34	Relative eye size	>= 1.34	eye diameter / head depth: Visual acuity
Ratio.eye.vertical.posit	< 0.47	Eye vertical position	< 0.47	eye position / body depth: Position of fish and /or its prey in the water column
Ratio.eye.vertical.posit	>= 0.47-0.55	Eye vertical position	>= 0.47-0.55	eye position / body depth: Position of fish and /or its prey in the water column
Ratio.eye.vertical.posit	>= 0.55-0.65	Eye vertical position	>= 0.55-0.65	eye position / body depth: Position of fish and /or its prey in the water column
Ratio.eye.vertical.posit	>= 0.65	Eye vertical position	>= 0.65	eye position / body depth: Position of fish and /or its prey in the water column
Ratio.maxillary.length	< 0.30	Relative maxillary length	< 0.30	maxillary jaw length / head depth: Size of mouth and strength of jaw
Ratio.maxillary.length	>= 0.30-0.75	Relative maxillary length	>= 0.30-0.75	maxillary jaw length / head depth: Size of mouth and strength of jaw
Ratio.maxillary.length	>= 0.75	Relative maxillary length	>= 0.75	maxillary jaw length / head depth: Size of mouth and strength of jaw
Ratio.oral.gape.posit	< 0.25	Oral gape position	< 0.25	oral gape position / bpdy depth: Feeding position in the water column
Ratio.oral.gape.posit	>= 0.25-0.43	Oral gape position	>= 0.25-0.43	oral gape position / bpdy depth: Feeding position in the water column
Ratio.oral.gape.posit	>= 0.43-0.52	Oral gape position	>= 0.43-0.52	oral gape position / bpdy depth: Feeding position in the water column
Ratio.oral.gape.posit	>= 0.52	Oral gape position	>= 0.52	oral gape position / bpdy depth: Feeding position in the water column
Ratio.pectoral.fin.posit	< 0.23	Pectoral fin vertical position	< 0.23	pectoral fin position / body depth: Pectoral fin use for swimming
Ratio.pectoral.fin.posit	>= 0.23-0.30	Pectoral fin vertical position	>= 0.23-0.30	pectoral fin position / body depth: Pectoral fin use for swimming
Ratio.pectoral.fin.posit	>= 0.30-0.36	Pectoral fin vertical position	>= 0.30-0.36	pectoral fin position / body depth: Pectoral fin use for swimming
Ratio.pectoral.fin.posit	>= 0.36	Pectoral fin vertical position	>= 0.36	pectoral fin position / body depth: Pectoral fin use for swimming
Ratio.pectoral.fin.size	< 0.56	Pectoral fin size	< 0.56	pectoral fin size / body depth: Pectoral fin use for swimming
Ratio.pectoral.fin.size	>= 0.56-0.75	Pectoral fin size	>= 0.56-0.75	pectoral fin size / body depth: Pectoral fin use for swimming
Ratio.pectoral.fin.size	>= 0.75-0.92	Pectoral fin size	>= 0.75-0.92	pectoral fin size / body depth: Pectoral fin use for swimming
Ratio.pectoral.fin.size	>= 0.92	Pectoral fin size	>= 0.92	pectoral fin size / body depth: Pectoral fin use for swimming
Repro.cycles	<= 1 cycle	Potential number of reproductive cycle per individual	<= 1 cycle
Repro.cycles	> 1-2 cycles	Potential number of reproductive cycle per individual	> 1-2 cycles
Repro.cycles	> 2-6 cycles	Potential number of reproductive cycle per individual	> 2-6 cycles
Repro.cycles	> 6 cycles	Potential number of reproductive cycle per individual	> 6 cycles
Repro.guild	brood hider	Reproductive guilds	Brood hiders: fish that lay eggs in existing shelters without modifying the environment
Repro.guild	nester	Reproductive guilds	Nesters: fish that exhibit particular behaviors towards building nests to lay eggs (modify the environment)
Repro.guild	other	Reproductive guilds	Various: fish laying eggs directly in the environment (open water, on the substrate…)
Repro.mode	lithophilic	Reproductive modes	Lithophilic: fish spawn exclusively on gravel, rocks, stones, rubbles or pebbles. hatchlings are photophobic.
Repro.mode	other	Reproductive modes	Various: fish laying eggs directly in the environment (open water, on the substrate…)
Repro.mode	phyto.litho	Reproductive modes	Phytolithophilic:fish deposit eggs in clear water habitats on submerged plants or on other submerged items such as logs, gravel and rocks. larvae are photophobic.
Repro.mode	phytophilic	Reproductive modes	Phytophilic: fish deposit eggs in clear water habitats on submerged plants.
Repro.period.length	2 months	Reproductive period	2 months
Repro.period.length	3 months	Reproductive period	3 months
Repro.period.length	4 months	Reproductive period	4 months
Repro.period.length	>= 5 months	Reproductive period	>= 5 months
Respiration mode	aquatic ventilation	Respiration mode	Aquatic, ventilation
Respiration mode	tolerant aerial respiration	Respiration mode	Aerial, no special organs: partially tolerant to aerial respiration
Rheophily	eurytopic	Degree of rheophily	Eurytopic: fish that exhibit a wide tolerance of flow conditions, although generally not considered to be rheophilic.
Rheophily	euryt.limno	Degree of rheophily	Eurytopic fish that tend to be limnophilic
Rheophily	euryt.rheo	Degree of rheophily	Eurytopic fish that tend to be rheophilic
Rheophily	limnophilic	Degree of rheophily	Limnophilic: fish prefer to live, feed and reproduce in a habitat with slow flowing to stagnant conditions.
Rheophily	rheophilic	Degree of rheophily	Rheophilic: fish prefer to live in a habitat with high flow conditions and clear water.
Spawning	fractional	Reproductive behavior	Fractional spawners: spawning events either repeated in a season or different components of the population spawn at different times.
Spawning	single	Reproductive behavior	Single: spawing event at only one time in the season
Spawning.end	fall or winter	Preferred season of reproductive period end	Fall or winter
Spawning.end	spring	Preferred season of reproductive period end	Spring
Spawning.end	summer	Preferred season of reproductive period end	Summer
Spawning.start	fall	Preferred season of reproductive period start	Fall
Spawning.start	spring	Preferred season of reproductive period start	Spring
Spawning.start	summer	Preferred season of reproductive period start	Summer
Spawning.start	winter	Preferred season of reproductive period start	Winter
Swim.mode	anguilliform	Swimming mode	Undulatory mode of swimming in which most or all the length of the body participates
Swim.mode	carangiform	Swimming mode	Only the posterior portion of the body is capable of wide flexure
Swim.mode	diodontiform	Swimming mode	Propulsion by undulation of median or pectoral fins: localized anguilliform undulation of the moderately broad pectoral fins- this mode is combines with other modes to generate rapid thrust as well as very precise maneuvering
Swim.mode	labriform	Swimming mode	Propulsion by oscillation of median or pectoral fins: - this mode is combines with other modes to generate rapid thrust as well as very precise maneuvering
Swim.mode	subcarangiform	Swimming mode	Similar to anguilliform but the side-to-side amplitude of the undulations is slight at the anterior, and expands significantly in the posterior half or one-third of the body
Tol.low.oxygen	intermediate	Tolerance to low oxygen concentration	Intermediate: relatively tolerant to low Oxygen concentration (O2)
Tol.low.oxygen	intolerant	Tolerance to low oxygen concentration	Intolerant: intolerant to low Oxygen concentration (O2). more than 6 mg/l in water
Tol.low.oxygen	tolerant	Tolerance to low oxygen concentration	Tolerant: tolerant to low Oxygen concentration (O2): 3 mg/l or less
Tol.temperature	euthermal	Thermal tolerance	Euthermal: fish capable of withstanding a wide range of temperature.
Tol.temperature	stenothermal	Thermal tolerance	Stenothermal: fish able to withstand only a narrow temperature range.
Up.therm.tol	<= 20°C	Upper thermal tolerance	<= 20°C
Up.therm.tol	24°C	Upper thermal tolerance	24°C
Up.therm.tol	25°C	Upper thermal tolerance	25°C
Up.therm.tol	26°C	Upper thermal tolerance	26°C
Up.therm.tol	>=27°C	Upper thermal tolerance	>=27°C

## Sheet: Table S4
Micropollutant	CAS registry number	Mode of action	EC50_diatoms	EC50_macroinvertebrates	EC50_fishes	Sources
Atrazine desethyl	6190-65-4	PHOTO	0.1	76.529	86.693	d: PPDB; m/f: Malaj
DDD 24'	53-19-0	NSSSM	0.145	0.0091	0.463	d/m/f: Malaj
DDD 44'	72-54-8	NSSSM	0.614	0.009	0.07	d: Malaj; m/f: PPDB
DDE 24'	3424-82-6	NSSSM	0.487	0.0193	0.0918	d/m/f: Malaj
DDE 44'	72-55-9	NSSSM	0.24	0.001	0.032	d: Malaj; m/f: PPDB
Atrazine	1912-24-9	PHOTO	0.059	85	4.5	d/m/f: PPDB
Bentazone	25057-89-0	PHOTO	10.1	100	100	d/m/f: PPDB
Chlortoluron	15545-48-9	PHOTO	0.024	67	20	d/m/f: PPDB
Diquat	2764-72-9	PHOTO	0.011	1.2	21	d/m/f: PPDB
Diuron	330-54-1	PHOTO	0.0027	5.7	6.7	d/m/f: PPDB
Ioxynil	1689-83-4	PHOTO	24	3.9	8.5	d/m/f: PPDB
Isoproturon	34123-59-6	PHOTO	0.013	0.58	18	d/m/f: PPDB
Linuron	330-55-2	PHOTO	0.016	0.31	3.15	d/m/f: PPDB
Methabenzthiazuron	18691-97-9	PHOTO	0.033	30.6	15.9	d/m/f: PPDB
Paraquat	4685-14-7	PHOTO	0.00023	4.4	19	d/m/f: PPDB
Simazine	122-34-9	PHOTO	0.04	1.1	90	d/m/f: PPDB
Terbumeton	33693-04-8	PHOTO	0.009	40	14	d/m/f: PPDB
Terbuthylazine	5915-41-3	PHOTO	0.012	21.2	2.2	d/m/f: PPDB
Terbutryne	886-50-0	PHOTO	0.0024	2.66	1.1	d/m/f: PPDB
Alachlore	15972-60-8	LIPID	0.966	10	1.8	d/m/f: PPDB
Ethofumesate	26225-79-6	LIPID	3.9	13.52	10.92	d/m/f: PPDB
Metolachlore	51218-45-2	LIPID	57.1	23.5	3.9	d/m/f: PPDB
Prosulfocarbe	52888-80-9	LIPID	0.049	0.51	0.84	d/m/f: PPDB
Fenpropidine	67306-00-7	STERO	0.0057	0.54	1.9	d/m/f: PPDB
Fenpropimorphe	67564-91-4	STERO	0.327	2.24	2.3	d/m/f: PPDB
Flusilazole	85509-19-9	STERO	6.4	3.4	1.2	d/m/f: PPDB
Prochloraz	67747-09-5	STERO	0.0055	4.3	1.5	d/m/f: PPDB
Tebuconazole	107534-96-3	STERO	1.96	2.79	4.4	d/m/f: PPDB
Tridemorphe	81412-43-3	STERO	0.28	1.3	3.4	d/m/f: PPDB
Aminotriazole	61-82-5	BAAPR	2.3	6.1	1000	d/m/f: PPDB
Cymoxanil	57966-95-7	BAAPR	0.254	27	29	d/m/f: PPDB
Endosulfan	115-29-7	BAAPR	2.15	0.44	0.002	d/m/f: PPDB
Glyphosate	1071-83-6	BAAPR	19	40	38	d/m/f: PPDB
Imazamethabenz-methyl	81405-85-8	BAAPR	78.1	220	100	d/m/f: PPDB
Aclonifene	74070-46-5	PIGMT	0.47	1.2	0.67	d/m/f: PPDB
Bifenox	42576-02-3	PIGMT	0.00018	0.66	0.67	d/m/f: PPDB
Norflurazone	27314-13-2	PIGMT	0.0176	15	8.1	d/m/f: PPDB
Acenaphtene	83-32-9	PAH	0.52	0.12	0.58	d: Malaj; m/f: INERIS
Acenaphtylene	208-96-8	PAH	0.509	4.204	3.659	d/m/f: Malaj
Anthracene	120-12-7	PAH	0.0039	0.0012	0.00127	d/m/f: INERIS
Benzo(a)pyrene	50-32-8	PAH	0.005	0.005	0.01	d/m/f: INERIS
Fluoranthene	206-44-0	PAH	0.01	0.01	0.05	d/m/f: PPDB
Fluorene	86-73-7	PAH	3.4	0.43	2.457	d/m/f: Malaj
Naphtalene	91-20-3	PAH	2.82	1	1.6	d/m/f: PPDB
Phenanthrene	85-01-8	PAH	0.5	0.35	0.15	d/m/f: PPDB
Carbendazime	10605-21-7	CYTO	7.7	0.15	0.19	d/m/f: PPDB
Pendimethaline	40487-42-1	CYTO	0.004	0.147	0.196	d/m/f: PPDB
Trifluraline	1582-09-8	CYTO	0.0122	0.245	0.088	d/m/f: PPDB
Cadmium	7440-43-9	MINER	0.01	0.01	0.0009	d/m/f: INERIS
Free cyanides	57-12-5	MINER	0.4	0.08	0.03	d/m/f: INERIS
Mercury	7439-97-6	MINER	0.01	0.01	0.0007	d/m/f: INERIS
Lead	7439-92-1	MINER	0.5	0.01	0.11	d/m/f: INERIS
Zinc	7440-66-6	MINER	0.14	0.03	0.07	d/m/f: INERIS
4-n-nonylphenol	104-40-5	ORGA	0.515	0.135	0.14	d/m/f: Malaj
4-nonylphenols	84852-15-3	ORGA	0.06	0.02	0.13	d/m/f: INERIS
Benzene	71-43-2	ORGA	28	10	5.3	d/m/f: INERIS
C10-13-chloroalcanes	85535-84-8	ORGA	1.3	0.01	0.34	d/m/f: INERIS
Chloroaniline-2	95-51-2	ORGA	35	0.46	5.231	d/m/f: INERIS
Chloroaniline-3	108-42-9	ORGA	21	0.35	18.75	d/m/f: INERIS
Chloroaniline-4	106-47-8	ORGA	6.3	0.05	2.4	d/m/f: INERIS
Chloroforme	67-66-3	ORGA	13.3	29	18	d/m/f: INERIS
Chloronitrobenzene-1.2	88-73-3	ORGA	6.9	3.2	25.5	d/m/f: INERIS
Chloronitrobenzene-1.3	121-73-3	ORGA	1.9	4.5	1.2	d/m/f: INERIS
Chloronitrobenzene-1.4	100-00-5	ORGA	4.9	2.7	2	d/m/f: INERIS
Dichloroaniline-3.4	95-76-1	ORGA	0.45	0.16	1.94	d/m/f: INERIS
Dichlorobenzene 12	95-50-1	ORGA	2.2	0.66	1.58	d/m/f: INERIS
Dichlorobenzene 13	541-73-1	ORGA	19	1.2	5.02	d/m/f: INERIS
Dichlorobenzene 14	106-46-7	ORGA	1.6	0.7	1.12	d/m/f: INERIS
Dichloroethane 12	107-06-2	ORGA	189	100	11.8	d/m/f: INERIS
Dichloroethylene-1.2 cis	156-59-2	ORGA	112.317	220	140	d: Malaj; m/f: INERIS
Dichloromethane	75-09-2	ORGA	500	194	193	d/m/f: INERIS
Dichlorophenol-2.4	120-83-2	ORGA	1.5	1.4	1	d/m/f: INERIS
Dichlorophenol-2.6	87-65-0	ORGA	29	3.4	7.748	d/m/f: Malaj
Dichlorure dibutyletain	683-18-1	ORGA	0.02	0.84	0.6	d/m/f: INERIS
EDTA	60-00-4	ORGA	0.78	480	1	d/m/f: INERIS
Hexachlorobenzene	118-74-1	ORGA	0.01	0.00473	0.01	d/m/f: INERIS
Hexachlorobutadiene	87-68-3	ORGA	0.143	0.5	0.09	d/m/f: Malaj
Nonylphenols	25154-52-3	ORGA	0.06	0.02	0.13	d/m/f: INERIS
Oxyde de dibutyletain	818-08-6	ORGA	1.6	1.52	0.84	d/m/f: INERIS
para-tert-Octylphenol	140-66-9	ORGA	1.1	0.01	0.17	d/m/f: INERIS
Pentachlorobenzene	608-93-5	ORGA	6.63	0.3	0.1	d/m/f: INERIS
Pentachlorophenol	87-86-5	ORGA	0.08	0.08	0.01	d/m/f: INERIS
p-octyl phenol	1806-26-4	ORGA	1.1	0.01	0.17	d/m/f: INERIS
Tetrachl.Carbone (tetrachloromethane)	56-23-5	ORGA	0.25	35	41.4	d/m/f: INERIS
Tetrachlorethane-1.1.2.2	79-34-5	ORGA	6.44	9.3	20	d/m/f: INERIS
Tetrachlorethylene	127-18-4	ORGA	3.64	8.5	5	d/m/f: INERIS
Toluene	108-88-3	ORGA	134	3.78	5.5	d/m/f: INERIS
Tributyletain	688-73-3	ORGA	0.005	0.00003	0.00069	d/m/f: INERIS
Trichlorethane-1.1.1	71-55-6	ORGA	37.645	11.2	28.8	d: Malaj; m/f: INERIS
Trichlorethylene	79-01-6	ORGA	36.5	21	28.3	d/m/f: INERIS
Trichlorobenzene-1.2.3	87-61-6	ORGA	0.9	0.33	0.35	d/m/f: INERIS
Trichlorobenzene-1.2.4	120-82-1	ORGA	1.4	2.1	1	d/m/f: INERIS
Trichlorobenzene-1.3.5	108-70-3	ORGA	1.685	0.4	3.3	d: Malaj; m/f: INERIS
Trichlorophenol-2.3.4	15950-66-0	ORGA	2	2.24	1.2	d/m/f: INERIS
Trichlorophenol-2.4.5	95-95-4	ORGA	1.22	0.9	0.26	d/m/f: INERIS
Trichlorophenol-2.4.6	88-06-2	ORGA	3.5	2.2	0.41	d/m/f: INERIS
Xylene	1330-20-7	ORGA	13.099	17.5	27.71	d/m/f: Malaj
Xylene-meta	108-38-3	ORGA	4.9	9.6	8.4	d/m/f: INERIS
Xylene-ortho	95-47-6	ORGA	4.7	3.2	7.6	d/m/f: INERIS
Xylene-para	106-42-3	ORGA	3.2	8.5	2.6	d/m/f: INERIS
Aldicarbe	116-06-3	NSSSM	50	0.42	0.56	d/m/f: PPDB
Aldrine	309-00-2	NSSSM	0.074	0.028	0.0046	d: Malaj; m/f: PPDB
Carbofuran	1563-66-2	NSSSM	6.5	0.0094	0.18	d/m/f: PPDB
Chlorfenvinphos	470-90-6	NSSSM	1.36	0.00025	1.1	d/m/f: PPDB
Chlorpyriphos-ethyl	2921-88-2	NSSSM	0.48	0.0001	0.025	d/m/f: PPDB
Deltamethrine	52918-63-5	NSSSM	0.00047	0.00056	0.00015	d/m/f: PPDB
Dieldrine	60-57-1	NSSSM	0.1	0.25	0.0012	d/m/f: PPDB
Endrine	72-20-8	NSSSM	0.039	0.0042	0.00073	d: Malaj; m/f: PPDB
HCH gamma	58-89-9	NSSSM	0.78	0.01	0.002	d/m/f: INERIS
Isodrine	465-73-6	NSSSM	0.074	1	0.012	d: Malaj; m/f: PPDB
Methomyl	16752-77-5	NSSSM	100	0.0076	0.63	d/m/f: PPDB
Oxydemeton-methyl	301-12-2	NSSSM	100	0.11	17	d/m/f: PPDB
Parathion ethyl	56-38-2	NSSSM	10	0.0025	1.5	d/m/f: PPDB
Parathion methyl	298-00-0	NSSSM	3	0.0073	2.7	d/m/f: PPDB
Dinitrocresol	534-52-1	CMEM	50	3.2	1.745	d/m/f: Malaj
Dinoterbe	1420-07-1	CMEM	7.4	0.47	0.0034	d/m/f: PPDB
Captane	133-06-2	MULTI	1.18	7.1	0.186	d/m/f: PPDB
Chlorothalonil	1897-45-6	MULTI	0.013	0.054	0.017	d/m/f: PPDB
Folpel	133-07-3	MULTI	10	0.68	0.233	d/m/f: PPDB
Mancozebe	8018-01-7	MULTI	0.044	0.073	0.074	d/m/f: PPDB

## Sheet: Table S5
	Modes of action
Trait syndrome	PHOTO	LIPID	STERO	BAAPR	PIGMT	PAH	CYTO	MINER	ORGA	NSSSM	CMEM	MULTI
Diatoms
TS1			Morphology_centrics, Life form_planktonic, Trophy_hypereutro								Saprobity_ameso	ALL
TS2								Saprobity_ameso/poly, Metabolism_N_hetero1, Oxygen_low			Oxygen_low, Attachment_never, Trophy_eutro, Salinity_brackish-fresh	Attachment_never, Guild_motile, Trophy_eutro
TS3	pH_acidophilous, Colony_ribbon		Colony_star, pH_acidophilous					Colony_star, pH_acidophilous		ALL		Colony_star, pH_acidophilous
TS4											Trophy_meso/eutro	Morphology_biraphids
TS5							Attachment_possible				Oxygen_high, Attachment_possible, Morphology_araphids, Guild_high
Macroinvertebrates
TS1				Form_flattened, Substrate_macrophytes, Resistance_diapause, Trophy_eutrophic, Repro.cycles_>6, Dissemination_>1000-10000 m, Voltinism_>1 gen/yr, Feeding_parasite, Resistance_cocoons
TS2						Locomotion_burrower						Current_slow
TS3		Saprobity_a-meso, poly		Saprobity_a-meso, poly, Trophy_mesotrophic, Current_null, Substrate_mud, Molting_0		Salinity_brackish	Salinity_brackish
TS4				Repro.tech_hermaphrodism, Repro.strat_ovoviviparity, Molting_1
TS5				Resistance_eggs, Repro.strat_clutches, terrestrial, Aquatic stages_nymph, Repro.strat_eggs, free, Life span_<=1 yr, Respiration_plastron, spiracle, Molting_2-4, Size_0.5-1 cm, Molting_[15-20[, Fecundity_>1000-3000
TS6		Voltinism_1 gen/yr		Dissemination_>100-1000 m, Flexibility_>10-45°, Food_microphytes							Aquatic stages_egg
TS7				Saprobity_oligo, Feeding_scraper, Saprobity_xeno			Saprobity_xeno, Current_fast					Saprobity_oligo, Trophy_oligotrophic, Current_medium, Feeding_scraper, Locomotion_crawler, interstitial, Saprobity_xeno, Substrate_> pebbles, Temperature_psychrophilic
TS8				Repro.cycles_1, Dispersal_aerial active, Repro.tech_male and female, Salinity_fresh, Form_streamlined, Repro.strat_eggs, cemented, Molting_>= 20, Aquatic stages_larva		Dispersal_aerial active	Repro.cycles_1
Fishes
TS1											Repro.period.length_>=5 months, Habitat.living_pelagic
TS2											Ratio.eye.vertical.posit_0.47-0.55, Max.body.weight_<22 g
TS3
TS4
TS5
TS6										Ratio.eye.vertical.posit_0.55-0.65	Ratio.eye.vertical.posit_0.55-0.65, Max.age.maturity_2-3 years
TS7	Incub.period_>14 days, Spawning_single, Fecundity.relat_<200 oocytes / g, Larval length_>6.3 cm	Fecundity.relat_<200 oocytes / g, Ratio.oral.gape.posit_0.43-0.52								Ratio.oral.gape.posit_0.43-0.52
TS8	Repro.period.length_4 months										Ratio.caudal.throttling_2.10-2.95

## Sheet: Table S6
Diatoms
Adjusted-R² from GAM including all trait categories for each trait syndrome
	Trait syndrome	PHOTO	LIPID	STERO	BAAPR	PIGMT	PAH	CYTO	MINER	ORGA	NSSSM	CMEM	MULTI
	1	0.0352	0.0595	0.0187	0.0135	0.0146	0.0354	0.0333	0.0745	0.0089	0.0688	0.0001	0.0096
	2	0.0723	0.0645	0.0180	0.0060	0.0358	0.0647	0.0479	0.0717	0.0293	0.1080	0.0115	0.0199
	3	0.0169	0.0032	0.0124	0.0056	0.0121	0.0171	0.0005	0.0121	0.0159	0.0105	0.0000	0.0095
	4	0.0771	0.0462	0.0219	0.0259	0.0620	0.0698	0.0808	0.0736	0.0254	0.0490	0.0060	0.0245
	5	0.0768	0.0612	0.0322	0.0167	0.0251	0.0677	0.0322	0.0606	0.0255	0.0719	0.0034	0.0347
Adjusted-R² from GAM with each trait category alone
Trait category	Trait syndrome	PHOTO	LIPID	STERO	BAAPR	PIGMT	PAH	CYTO	MINER	ORGA	NSSSM	CMEM	MULTI
Morphology_centrics	1	0.0044	0.0362	0.0106				0.0119	0.0216		0.0333		0
Guild_euplanktonic	1	0.0060	0.0382	0.0129				0.0092	0.0186		0.0259		0
Life form_planktonic	1	0.0077	0.0249	0.0114				0.0164	0.0187		0.0284		0.0005
Trophy_hypereutro	1	0.0118	0.0179	0.0096					0.0062		0.0124		0
Saprobity_poly	1	0.0111	0.0150	0.0083					0.0114		0.0199		0.0009
Oxygen_very_low	1	0.0069	0.0188					0.0065			0.0158		0.0013
Saprobity_ameso	1	0.0167	0.0440						0.0387		0.0467	0	0
Oxygen_moderate	1		0.0288						0.0605		0.0330		0
Saprobity_ameso/poly	2	0.0172	0.0388				0.0154		0.0625		0.0268		0.0028
Metabolism_N_hetero1	2	0.0224	0.0392				0.0142		0.0622		0.0254		0.0051
Oxygen_low	2	0.0176	0.0384				0.0183		0.0638		0.0255	0.0002	0.0054
Metabolism_N_hetero2	2	0.0398	0.0299						0.0266		0.0455		0.0009
Attachment_never	2	0.0418	0.0418				0.0298	0.0272	0.0286		0.0474	0.0015	0.0086
Guild_motile	2	0.0489	0.0296				0.0350	0.0279	0.0264		0.0309		0.0109
Trophy_eutro	2	0.0486	0.0455				0.0413	0.0199	0.0316		0.0397	0.0019	0.0063
Salinity_brackish-fresh	2	0.0217	0.0299				0.0194		0.0183		0.0432	0	0.0011
Colony_star	3			0.0110					0.0078		0.0024		0
pH_acidophilous	3	0.0127		0.0040			0.0149		0.0106		0.0076		0
Colony_ribbon	3	0.0117					0.0077				0.0089
Size_Cl7	4	0.0091					0.0304	0.0372
Size_Cl6	4	0.0020					0.0198	0.0292
Size_Cl4	4						0.0115	0.0189	0.0053		0.0167		0
Colony_no	4	0.0298	0.0142				0.0303		0.0074				0.0061
pH_alkaliphilous	4	0.0397	0.0154				0.0500	0.0277	0.0098
Morphology_biraphids	4	0.0569					0.0387		0.0085				0.0137
Trophy_meso/eutro	4	0.0132			0.0067		0.0155	0.0201				0.0001
Salinity_fresh-brackish	4	0.0095			0.0043		0.0180
Oxygen_fairly_high	4	0.0374				0.0368	0.0481	0.0480
Saprobity_bmeso	4					0.0209	0.0205	0.0266	0.0093
Morphology_monoraphids	5	0.0509	0.0184				0.0241	0.0169	0.01		0.0198		0.0050
Oxygen_high	5	0.0386	0.0170				0.0241		0.0055		0.0072	0.0014	0.0102
Trophy_meso	5	0.0508	0.0255				0.0223	0.0149	0.0169				0.0046
Attachment_possible	5	0.0412	0.0423				0.0295	0.027	0.0283		0.0470	0.0015	0.0086
Guild_low	5	0.0326	0.0318				0.0175	0.0194	0.0207		0.0319		0.0055
Colony_arbuscular	5	0.0081	0.0149				0.0115		0.0099		0.0221		0
Trophy_indifferent	5	0.0138	0.0240				0.0075		0.0049		0.0265		0.0063
Life form_benthic	5	0.0051	0.0191	0.0095				0.0119	0.0116		0.0217		0.0007
Colony_zigzag	5	0.0073	0.0129						0.0136				0.0034
Morphology_araphids	5	0.0106				0.0091						0.0001
Guild_high	5	0.0176					0.0193					0	0.0034
Colony_mucus	5	0.0178	0.0225				0.0117						0.0036
pH_neutrophilous	5	0.0277					0.0278	0.0164

## Sheet: Table S7
Macroinvertebrates
Adjusted-R² from GAM including all trait categories for each trait syndrome
	Trait syndrome	PHOTO	LIPID	STERO	BAAPR	PIGMT	PAH	CYTO	MINER	ORGA	NSSSM	CMEM	MULTI
	1	0.0990	0.0736	0.0209	0.0121	0.0143	0.0772	0.0797	0.0497	0.0530	0.0400	0.0060	0.0309
	2	0.0868	0.1143	0.0403	0.0592	0.0123	0.0243	0.0873	0.0635	0.1216	0.0735	0.0079	0.0475
	3	0.0969	0.0529	0.0291	0.0158	0.0009	0.0454	0.0538	0.0611	0.0065	0.0413	0.0033	0.0325
	4	0.1442	0.1062	0.0363	0.0201	0.0057	0.0752	0.0876	0.0743	0.0874	0.0630	0.0179	0.0577
	5	0.1211	0.1430	0.0190	0.0123	0.0114	0.0386	0.0879	0.0353	0.0766	0.0573	0.0053	0.0236
	6	0.0661	0.0506	0.0174	0.0129	0.0254	0.0583	0.0505	0.0436	0.0245	0.0450	0.0048	0.0123
	7	0.0859	0.0942	0.0298	0.0206	0.0052	0.0385	0.0345	0.0455	0.0808	0.0709	0.0050	0.0120
	8	0.1024	0.0783	0.0230	0.0153	0.0115	0.0589	0.0736	0.0615	0.0510	0.0353	0.0055	0.0273
Adjusted-R² from GAM with each trait category alone
Trait category	Trait syndrome	PHOTO	LIPID	STERO	BAAPR	PIGMT	PAH	CYTO	MINER	ORGA	NSSSM	CMEM	MULTI
Form_flattened	1	0.0240	0.0234		0		0.0234	0.0398
Food_dead plant/animals	1	0.0148	0.0156	0.0067			0.0102	0.0249
Repro.tech_single individual	1	0.0057					0.0168			0.0104
Substrate_macrophytes	1	0.0309	0.0096		0.0055
Resistance_diapause	1	0.0462	0.0118		0.0069		0.0084	0.0088		0.0096
Trophy_eutrophic	1	0.0401	0.0161		0.0108		0.0127
Repro.cycles_>6	1	0.0312	0.0208		0.0020		0.0232	0.0159	0.0250
Dissemination_>1000-10000 m	1	0.0411	0.0203		0.0049		0.0269		0.0052	0.0138
Voltinism_>1 gen/yr	1	0.0449	0.0346		0.0023		0.0587
Feeding_parasite	1	0.0318	0.0066		0.0031		0.0191	0.0158	0.0052
Resistance_cocoons	1	0.0206	0.0079		0.0016		0.0181	0.0222	0.0031
Saprobity_b-meso	2	0.0134	0.0051		0.0045								0.0027
Current_slow	2	0.0241	0.0142		0.0032			0.0185		0.0121			0.0334
Respiration_gill	2	0.0216	0.0402		0.0006			0.0356		0.0168			0.0078
Substrate_silt	2	0.0462	0.0367		0.0043		0.0073	0.0340		0.0050			0.0005
Life span_>1 yr	2	0.0356	0.0236		0.0009		0.0068	0.0155	0.0226	0.0220	0.0099		0.0016
Locomotion_burrower	2	0.0328	0.0178		0.0024		0.0130	0.0334		0.0040
Size_2-4 cm	2	0.0224	0.0188		0.0013		0.0045	0.0339		0.0095			0.0051
Feeding_filter-feeder	2	0.0201	0.0109		0.0034			0.0148	0.0115	0.0238	0.0044		0.0008
Food_microinvertebrates	2	0.0350	0.0288		0.0084		0.0072	0.0200	0.0138	0.0174	0.0082		0
Flexibility_<10°	2	0.0123	0.0167		0.0049			0.0263	0.0100	0.0656	0.0035		0
Dissemination_<=10 m	2	0.0124	0.0223		0.0034			0.0093	0.0154		0.0122		0
Repro.strat_clutches, free	2	0.0242	0.0240		0.0282			0.0004	0.0067		0.0160		0
Temperature_eurythermic	2	0.0208	0.0163		0.0375				0.0043		0.0149
Molting_[10-15[	2				0.0012						0.0263		0.0047
Saprobity_a-meso, poly	3	0.0643	0.0394		0.0143		0.0219	0.0233	0.0075				0
Size_>4 cm	3	0.0376	0.0349		0.0049		0.0165	0.0285	0.0271		0.0128		0.0041
Trophy_mesotrophic	3	0.0499	0.0168		0.0101		0.0112	0.0075					0.0029
Current_null	3	0.0580	0.0359		0.0099		0.0166	0.0258					0.0013
Substrate_mud	3	0.0617	0.0319		0.0117		0.0161	0.0235	0.0049
Salinity_brackish	3	0.0766	0.0342		0.0132		0.0341	0.0433					0.0005
Molting_0	3	0.0576	0.0228		0.0056		0.0233	0.0312	0.0285
Dispersal_aquatic passive	4	0.0833	0.0545		0.0039		0.0493	0.0583	0.0143	0.0123			0.0006
Aquatic stages_adult	4	0.0734	0.0381		0.0044		0.0247	0.0573	0.0261	0.0234			0.0025
Repro.tech_hermaphrodism	4	0.0817	0.0437		0.0094		0.0250	0.0579	0.0373	0.0177			0.0131
Repro.strat_ovoviviparity	4	0.0806	0.0647		0.0089		0.0407	0.0706	0.0071	0.0202			0
Repro.cycles_>2-6	4	0.0610	0.0563		0.0026		0.0462	0.0614	0.0188	0.0126			0.0059
Form_spherical	4	0.0614	0.0296	0.0042	0.0072		0.0121	0.0411	0.0215	0.0144			0.0108
Fecundity_<=100	4	0.0535	0.0273	0.0122	0.0016		0.0346	0.0538		0.0245			0
Molting_1	4	0.0628	0.0576		0.0095		0.0150	0.0633	0.0176	0.0440			0.0076
Dissemination_>10000 m	4	0.0420	0.0368		0		0.0208	0.0663		0.0379			0.0133
Resistance_eggs	5	0.0358	0.0242		0.0041			0.043		0.0278			0
Repro.strat_clutches, terrestrial	5	0.0429	0.0378		0.0047		0.0138	0.0226					0.0016
Aquatic stages_nymph	5	0.0315	0.0293	0.0072	0			0.0230			0.0194		0
Repro.strat_eggs, free	5	0.0166	0.0197		0.0027			0.0099		0.031			0
Life span_<=1 yr	5	0.0351	0.0232		0.0009		0.0066	0.0154		0.022	0.0098		0.0015
Respiration_plastron, spiracle	5	0.0311	0.0412		0.0051		0.0070	0.0228					0
Molting_2-4	5	0.0065	0.0139		0.0003			0.0063			0.0025		0.0076
Size_0.5-1 cm	5	0.0089	0.0123		0.0005			0.0080			0.0097		0.0098
Molting_[15-20[	5	0.0253	0.0055		0.0039			0.0243		0.0174
Fecundity_>1000-3000	5	0.0260	0.0131		0.0031			0.0216	0.0103	0.0324
Flexibility_>45°	5		0.0347					0.0369		0.0254			0.0023
Repro.strat_asexual	5	0.0113	0.0099					0.0185		0.0402	0.0079		0.0007
Dissemination_>100-1000 m	6	0.0119			0.0040		0.0081
Flexibility_>10-45°	6	0.0128			0.0054		0.0053		0.0028
Food_microphytes	6	0.0267	0.0123		0.0110		0.0052		0.0021
Voltinism_1 gen/yr	6	0.0425	0.0404		0.0015		0.0290
Molting_[5 - 10[	6	0.0244	0.0146		0.0011		0.0108
Fecundity_>100-1000	6	0.0259	0.0075		0		0.0344	0.0373
Voltinism_<1 gen/yr	6	0.0148			0.0016		0.0408				0.0044
Aquatic stages_egg	6				0.0013		0.0158			0.0070	0.0305	0
Saprobity_oligo	7	0.0534	0.0288		0.0143		0.0156	0.0181	0.0038				0.0038
Trophy_oligotrophic	7	0.0506	0.0236		0.0135		0.0132	0.0187					0
Current_medium	7	0.0507	0.0365		0.0059		0.0124	0.0225					0
Feeding_scraper	7	0.0373	0.0283		0.0098		0.0050	0.0150	0.0095	0.0081			0
Locomotion_crawler, interstitial	7	0.0315	0.0127		0.0044		0.0072	0.0208	0.0083	0.0072			0
Saprobity_xeno	7	0.0508	0.0325		0.0104			0.0241	0.0110	0.0110			0.0028
Current_fast	7	0.0581	0.0369		0.0090		0.0057	0.0309		0.0079			0.0002
Substrate_> pebbles	7	0.0662	0.0448		0.0087		0.0217	0.0220		0.0091	0.0143		0
Temperature_psychrophilic	7	0.0238	0.0264		0.0077			0.0184	0.0141	0.0220	0.0112		0.0032
Repro.cycles_1	8	0.0606	0.0395		0.0024		0.0369	0.0601		0.0174			0
Dispersal_aerial active	8	0.0688	0.0337		0.0035		0.0483	0.0572	0.0018	0.0077
Form_cylindrical	8	0.0637	0.0347		0.0014		0.0237	0.0522		0.0096			0.0017
Repro.tech_male and female	8	0.0711	0.0373		0.0082		0.0294	0.0482	0.0310	0.0073			0.0089
Salinity_fresh	8	0.0755	0.0336		0.0131		0.0335	0.0430					0.0005
Form_streamlined	8	0.0241	0.0139		0.0081		0.0116	0.0321	0.0199	0.0110			0.0043
Repro.strat_eggs, cemented	8	0.0629	0.0394		0.0060		0.0217	0.0456	0.0142	0.0126
Molting_>= 20	8	0.0482	0.0223		0.0082		0.0234	0.0354	0.0038	0.0168
Aquatic stages_larva	8	0.0478	0.0216		0.0046		0.0171	0.0401	0.0203	0.0200			0.0111

## Sheet: Table S8
Fishes
Adjusted-R² from GAM including all trait categories for each trait syndrome
	Trait syndrome	PHOTO	LIPID	STERO	BAAPR	PIGMT	PAH	CYTO	MINER	ORGA	NSSSM	CMEM	MULTI
	1	0.0895	0.0679	0.1015	0.0737	0.0253	0.0731	0.0787	0.0327	0.024	0.0299	0.0099	0.0479
	2	0.0442	0.0574	0.0627	0.1013	0.0204	0.0606	0.0622	0.0343	0.0083	0.0270	0.0078	0.1296
	3	0.0762	0.0796	0.0814	0.1028	0.0394	0.0747	0.0840	0.0444	0.0290	0.0325	0.0142	0.1073
	4	0.0501	0.0606	0.0365	0.0615	0.0191	0.0302	0.0401	0.0126	0.0215	0.0188	0.0092	0.0529
	5	0.0528	0.0768	0.0498	0.0583	0.0276	0.0284	0.0520	0.0464	0.0127	0.0118	0.0091	0.0639
	6	0.0834	0.0530	0.0779	0.0804	0.0224	0.0745	0.0796	0.0399	0.0097	0.0210	0.0085	0.0742
	7	0.0103	0.0370	0.0556	0.0412	0.0274	0.0117	0.0340	0.0359	0.0108	0.0212	0.0029	0.0831
	8	0.0498	0.0647	0.0575	0.0759	0.0089	0.0454	0.0485	0.0363	0.0110	0.0173	0.0052	0.0559
Adjusted-R² from GAM with each trait category alone
Trait category	Trait syndrome	PHOTO	LIPID	STERO	BAAPR	PIGMT	PAH	CYTO	MINER	ORGA	NSSSM	CMEM	MULTI
Ratio.maxillary.length_0.30-0.75	1	0.0129	0.0092	0.0095			0.0029
Rheophily_euryt.limno	1	0.0319	0.0066	0.0138				0.0146					0.0076
Repro.mode_phytophilic	1	0.0367	0.0102				0.0072	0.0196					0.0004
Swim.mode_labriform	1	0.0295	0.0155	0.0163			0.0058	0.0237					0.0000
Egg diameter_1.5-2.0 mm	1	0.0244	0.0086	0.0181			0.0430	0.0183
Repro.period.length_>=5 months	1	0.0117	0.0295									0.0000	0.0078
Tol.low.oxygen_intermediate	1	0.0121	0.0302		0.0058		0.0249	0.0144	0.0106				0.0109
Habitat.living_pelagic	1	0.0246	0.0118									0.0006	0.0002
Spawning.end_spring	1	0.0126		0.0288			0.0054	0.0233					0.0155
Parental care_protection	1	0.0216		0.0204				0.0298
Up.therm.tol_>= 27°C	1	0.0205					0.0043	0.0340
Spawning.start_winter	1			0.0314	0.0261		0.0041	0.0359
Repro.period.length_2 months	1			0.0319				0.0135					0.0000
Ratio.eye.size_< 0.89	2							0.0074			0.0115		0.0083
Feeding group_detritivore	2			0.0222				0.0208			0.0147		0.0091
Food_detritus <= 1 mm	2		0.0219					0.0203	0.0159		0.0140		0.0463
Max.age.maturity_>= 5 years	2				0.0598						0.0073		0.0548
Dispersal_catadrom.anadrom	2				0.0476						0.0029		0.0479
Repro.cycles_<= 1 cycle	2			0.0146	0.0337		0.0156	0.0091			0.0088		0.0315
Body form_eel.like	2			0.0141	0.0373			0.0094			0.0114		0.0318
Habitat.living_dem.benth	2			0.0105					0.0125				0.0165
Swim.mode_anguilliform	2			0.0133	0.0144			0.0045	0.0042				0.0123
Ratio.eye.vertical.posit_0.47-0.55	2	0.0062		0.0166					0.0101		0.0087	0.0003	0.0093
Fecundity.relat_200-600 oocytes / g	2	0.0203	0.0210	0.0229									0.0075
Up.therm.tol_<= 20°C	2	0.0112	0.0218						0.0177				0.0204
Max.body.weight_<22 g	2	0.0033	0.0092	0.0119								0.0007
Food_plant <=1 mm	2		0.0021	0.0156									0.0135
Spawning.start_spring	3	0.0074	0.0187		0.0137								0.0141
Larval length_4.2-6.3 cm	3	0.0048	0.0180		0.0182								0.0147
Ratio.eye.size_1.09-1.34	3	0.0045	0.0230		0.0223
Dispersal_resid.potamo	3	0.0121	0.0184		0.0338				0.0164		0.0135		0.0129
Spawning_fractional	3	0.0084	0.0191		0.0112				0.0227				0.0089
Repro.guild_other	3	0.0091	0.0123		0.0147								0.0072
Repro.period.length_3 months	3	0.0164	0.0153		0.0120				0.0103				0.0095
Egg diameter_< 1.1 mm	3	0.0069	0.0460		0.0058				0.0097				0.0103
Ratio.caudal.throttling_< 2.1	3		0.0254		0.0070				0.0279				0.0146
Up.therm.tol_26°C	3		0.0183						0.0071				0.0191
Feeding group_omniv.insect	3		0.0257		0.0007				0.0094				0.0165
Ratio.maxillary.length_< 0.3	3		0.0182		0.0018				0.0261				0.0264
Rheophily_euryt.rheo	3				0.0002				0.0278				0.0051
Incub.period_<= 7 days	3	0.0237	0.0157		0.0137								0.0218
Habitat.living_benth.pel	3	0.0083	0.0254		0.0045
Max.age.maturity_3-4 years	3	0.0083	0.0233				0.0081
Repro.cycles_> 6 cycles	3		0.0185		0.0042								0.0064
Life span_8-15 years	3		0.0188		0.0197						0.0138		0.0101
Fecundity.absol_>=350K oocytes	3	0.0060	0.0181		0.0295								0.0273
Repro.mode_other	3	0.0060	0.0240		0.0306								0.0289
Ratio.oral.gape.posit_>=0.52	3	0.0030	0.0130		0.0219								0.0119
Feeding group_piscivore	4	0.0136	0.0218										0.0043
Food_plant 1-10 mm	4	0.0118	0.0242		0.0050		0.0044						0.0050
Min.water.height_5-15 cm	4	0.0016	0.0197		0.0075								0.0094
Max.body.length_45.6-91.2 cm	4	0.0012	0.0176		0.0065								0.0089
Max.speed_3-4 m.s-1	4	0.0025	0.0193		0.0048		0.0053						0.0056
ICE.class_no crossing above 1 m	4	0.0025	0.0193		0.0048		0.0053						0.0056
Dist.with.current_>500-1000 m	4	0.0040	0.0228		0.0115						0.0021		0.0099
Ratio.body.lateral.shape_<0.41	4	0.0068	0.0273		0.0185								0.0164
Dist.against.current_>500-10K m	4	0.0130	0.0320		0.0124						0.0024		0.0095
Food_plant >10 mm	4	0.0099	0.0295		0.0096								0.0131
Food_detritus >10 mm	4	0.0084	0.0262		0.0107		0.0057						0.0136
Food_detritus 1-10 mm	4	0.0116	0.0275		0.0094								0.0119
Rheophily_limnophilic	4	0.0166	0.0245		0.0193								0.0053
Body form_flat.deep	4	0.0093	0.0167		0.0202								0.0041
Tol.low.oxygen_tolerant	4	0.0274	0.0288		0.0403								0.0147
Ratio.oral.gape.posit_0.25-0.43	4	0.0176	0.0197		0.0103								0.0003
Max.body.length_22.8-45.6 cm	4	0.0207	0.0299		0.0151								0.0015
Habitat.spawning_euryopar	4	0.0144	0.0271		0.0080								0.0112
Ratio.eye.vertical.posit_<0.47	4	0.0038	0.0230		0.0103								0.0108
Max.body.weight_1100-5100 g	5	0.0174	0.0336		0.0309			0.0116					0.0058
Dist.with.current_>10K-100K m	5	0.0210	0.0307		0.0077								0.0064
Fecundity.absol_65K-350K oocytes	5	0.0179	0.0383		0.0211			0.0154					0.0114
Habitat.spawning_limnopar	5	0.0275	0.0353		0.0105			0.0272					0.0131
Feeding group_omnivore	5	0.0220	0.0366		0.0116		0.0056	0.0121					0.0129
Ratio.caudal.throttling_>= 2.95	5	0.0246	0.0189		0.0145			0.0199	0.0014				0.0010
Swim.mode_carangiform	5	0.0100	0.0018		0.0041			0.0158					0.0002
Fecundity.absol_45K-65K oocytes	5	0.0166	0.0146	0.0156	0.0189		0.0120	0.0180	0.0114				0.0166
Tol.temperature_euthermal	5	0.0214	0.0488		0.0294		0.0151						0.0234
Max.growth.param_0.24-0.48	5	0.0215	0.0424		0.0148		0.0029	0.0090	0.0057				0.0143
Repro.mode_phyto.litho	5	0.0196	0.0405		0.0196			0.0146	0.0156				0.0221
Max.body.weight_202-1100 g	5	0.0136	0.0305		0.0096			0.0113	0.0089				0.0140
Respiration mode_tolerant aerial respiration	5	0.0261	0.0305		0.0240		0.0042						0.0088
Rheophily_eurytopic	5	0.0169	0.0290		0.0165		0.0059						0.0097
Ratio.eye.size_>= 1.34	6	0.0104	0.0116										0.0117
Max.body.weight_>= 5100 g	6	0.0108	0.0115										0.0157
Max.body.length_>= 91.2 cm	6	0.0074	0.0181				0.0069						0.0087
Feeding group_insect.pisc	6	0.0098	0.0212				0.0073						0.0091
Max.growth.param_0.48-0.96	6	0.0137	0.0231		0.0085		0.0170						0.0111
Habitat.living_dem.pel	6	0.0214	0.0280		0.0046								0.0082
Max.speed_>= 4-7 m.s-1	6	0.0194	0.0264		0.0074		0.0063						0.0104
ICE.class_no crossing above 3 m	6	0.0194	0.0264		0.0074		0.0063						0.0104
Ratio.maxillary.length_>= 0.75	6	0.0166	0.0270		0.0075		0.0050						0.0110
Ratio.body.lateral.shape_0.41-0.51	6	0.0166	0.0088	0.0143			0.0152	0.0262					0.0139
Respiration mode_aquatic ventilation	6	0.0243	0.0205	0.0208				0.0338					0.0141
Fecundity.absol_2.4K-7.2K oocytes	6	0.0223	0.0134		0.0125		0.0202	0.0170					0.0055
Dispersal_potamodromous	6	0.0199	0.0108	0.0123	0.0134				0.0062				0.0079
Body form_fusiform.streamlined	6	0.0146	0.0105		0.0199								0.0211
Ratio.eye.vertical.posit_0.55-0.65	6	0.0101		0.0223				0.0178			0.0078	0.0020	0.0050
Egg diameter_> 2 mm	6	0.0112		0.0219				0.0193					0.0061
Swim.mode_subcarangiform	6	0.0148		0.0245				0.0322					0.0000
Parental care_no protection	6	0.0216		0.0204				0.0298
Max.age.maturity_2-3 years	6			0.0152					0.0127			0.0001
Incub.period_> 14 days	7	0.0048	0.0163		0.0141
Dist.against.current_> 0.5-50 m	7		0.0110		0.0132								0.0142
Spawning_single	7	0.0080	0.0196		0.0111				0.0232				0.0098
Repro.guild_nester	7		0.0155		0.0097								0.0094
Fecundity.relat_< 200 oocytes / g	7	0.0102	0.0262		0.0163				0.0157				0.0278
Larval length_> 6.3 cm	7	0.0094	0.0253		0.0224				0.0086				0.0165
Ratio.oral.gape.posit_0.43-0.52	7		0.0292		0.0246				0.0118		0.0112		0.0501
Spawning.end_fall or winter	8	0.0243	0.0338		0.0079		0.0060						0.0120
Spawning.start_fall	8	0.0241	0.0336		0.0078		0.0061						0.0120
Min.water.height_>= 15-25 cm	8	0.0240	0.0340		0.0075		0.0068						0.0118
Dist.with.current_> 5-50 m	8	0.0213	0.0313		0.0109				0.0052				0.0128
Habitat.spawning_rheopar	8	0.0253	0.0296		0.0258			0.0243					0.0134
Food_animal 1-10 mm	8	0.0079	0.0299		0.0120								0.0193
Repro.period.length_4 months	8	0.0447	0.0226	0.0191	0.0078		0.0056	0.0272	0.0045				0.0086
Repro.mode_lithophilic	8	0.0365	0.0361		0.0197			0.0200	0.0124				0.0216
Rheophily_rheophilic	8	0.0364	0.0391		0.0244			0.0175	0.0088				0.0188
Tol.low.oxygen_intolerant	8	0.0288	0.0468		0.0229			0.0124	0.0050				0.0168
Tol.temperature_stenothermal	8	0.0214	0.0488		0.0294		0.0151						0.0234
Ratio.caudal.throttling_2.1-2.95	8	0.0248	0.0306		0.0195			0.0193	0.0176			0.0006	0.0203

## Sheet: Table S9
Taxa	Order	Family	Trait syndrome	Distance
Stephanodiscus parvus Stoermer et Hakansson	Thalassiosirales	Stephanodiscaceae	TS1	2.2131
Nitzschia arcuata var subarcuata Grunow in Van Heurck	Bacillariales	Bacillariaceae	TS1	2.3260
Nitzschia balcanica Hustedt	Bacillariales	Bacillariaceae	TS1	2.3414
Nitzschia capitellata Hustedt in A.Schmidt & al.	Bacillariales	Bacillariaceae	TS1	2.3414
Nitzschia capitellata Hust.var.tenuirostris (Grunow in Van Heurck) Bukhtiyarova	Bacillariales	Bacillariaceae	TS1	2.3414
Nitzschia gandersheimiensis Krasske f.tenuirostris (Grunow in V. Heurck) Lange-Bertalot	Bacillariales	Bacillariaceae	TS1	2.3414
Nitzschia subcapitellata Hustedt	Bacillariales	Bacillariaceae	TS1	2.3414
Nitzschia capitellata Hustedt Sippen tenuirostris/subcapitellata Lange-Bertalot in KLB	Bacillariales	Bacillariaceae	TS1	2.3414
Nitzschia diserta Hustedt	Bacillariales	Bacillariaceae	TS1	2.3414
Nitzschia salinicola Aleem & Hustedt	Bacillariales	Bacillariaceae	TS1	2.3414
Luticola peguana (Grunow in Cl. & Moeller) D.G. Mann	Naviculales	Diadesmidaceae	TS2	0.8853
Navicula goeppertiana (Bleisch) Sm var.peguana (Grunow) Lange-Bertalot	Naviculales	Naviculaceae	TS2	0.8853
Luticola peguana (Grunow in Cl. & Moeller) D.G. Mann abnormal form	Naviculales	Diadesmidaceae	TS2	0.8871
Luticola goeppertiana (Bleisch in Rabenhorst) D.G. Mann in Round Crawford & Mann	Naviculales	Diadesmidaceae	TS2	0.8894
Luticola goeppertiana (Bleisch in Rabenhorst) D.G. Mann abnormal form	Naviculales	Diadesmidaceae	TS2	0.8894
Navicula goeppertiana (Bleisch) H.L.Smith	Naviculales	Naviculaceae	TS2	0.8894
Eolimna tantula (Hustedt) Lange-Bertalot	Naviculales	Naviculaceae	TS2	0.8986
Navicula molestiformis Hustedt	Naviculales	Naviculaceae	TS2	0.9175
Navicula twymaniana Archibald	Naviculales	Naviculaceae	TS2	0.9175
Navicula (dicta) seminulum (Grunow) Lange Bertalot abnormal form	Naviculales	Naviculaceae	TS2	0.9283
Eunotia curtagrunowii Nörpel-Schempp & Lange-Bertalot	Eunotiales	Eunotiaceae	TS3	0.4359
Eunotia pectinalis (Kütz.) Rabenhorst var.ventralis (Ehr.) Hustedt	Eunotiales	Eunotiaceae	TS3	0.4407
Eunotia eurycephala (Grun.) Nörpel-Schempp & Lange-Bertalot	Eunotiales	Eunotiaceae	TS3	0.4458
Eunotia hexaglyphis Ehrenberg	Eunotiales	Eunotiaceae	TS3	0.4458
Grammatophora serpentina (Ralfs) Ehrenberg	Striatellales	Striatellaceae	TS3	0.4556
Eunotia muscicola Krasske var. tridentula Nörpel & Lange-Bertalot	Eunotiales	Eunotiaceae	TS3	0.4587
Eunotia paratridentula Lange-Bertalot & Kulikovskiy in Kulikovskiy	Eunotiales	Eunotiaceae	TS3	0.4587
Eunotia seminulum Nörpel & Lange-Bertalot	Eunotiales	Eunotiaceae	TS3	0.4587
Eunotia inflata (Grun.) Nörpel-Schempp & Lange-Bertalot	Eunotiales	Eunotiaceae	TS3	0.4607
Grammatophora marina (Lyngbye) Kützing	Striatellales	Striatellaceae	TS3	0.4892
Surirella robusta Ehrenberg var.splendida (Ehr.) Van Heurck	Surirellales	Surirellaceae	TS4	0.3480
Surirella splendida (Ehrenberg) Kützing	Surirellales	Surirellaceae	TS4	0.3480
Stauroneis kriegeri Patrick	Naviculales	Stauroneidaceae	TS4	0.3986
Nitzschia fonticola Grunow fo.minutissima Compère	Bacillariales	Bacillariaceae	TS4	0.4212
Nitzschia fonticola Grunow in Van Heurck	Bacillariales	Bacillariaceae	TS4	0.4212
Nitzschia fonticola Grunow in Cleve et Möller abnormal form	Bacillariales	Bacillariaceae	TS4	0.4212
Nitzschia romana Grunow in Van Heurck	Bacillariales	Bacillariaceae	TS4	0.4212
Pinnularia major (Kützing) Rabenhorst	Naviculales	Pinnulariaceae	TS4	0.4233
Nitzschia dissipata (Kützing) Grunow ssp.dissipata	Bacillariales	Bacillariaceae	TS4	0.4252
Cavinula pseudoscutiformis (Hustedt) Mann & Stickle in Rounnd Crawford & Mann	Naviculales	Cavinulaceae	TS4	0.4267
Achnanthidium subhudsonis (Hustedt) H. Kobayasi	Achnanthales	Achnanthaceae	TS5	1.0612
Achnanthidium helveticum (Hustedt) Monnier Lange-Bertalot & Ector	Achnanthales	Achnanthaceae	TS5	1.0664
Achnanthidium biasolettianum (Grunow) Lange-Bertalot abnormal form	Achnanthales	Achnanthaceae	TS5	1.0664
Achnanthidium biasolettianum (Grunow in Cl. & Grun.) Lange-Bertalot	Achnanthales	Achnanthaceae	TS5	1.0698
Achnanthidium pyrenaicum (Hustedt) Kobayasi abnormal form	Achnanthales	Achnanthaceae	TS5	1.0698
Achnanthidium pyrenaicum (Hustedt) Kobayasi	Achnanthales	Achnanthaceae	TS5	1.0698
Achnanthes subhudsonis Hustedt	Achnanthales	Achnanthaceae	TS5	1.0810
Achnanthes biasolettiana Grunow abnormal form	Achnanthales	Achnanthaceae	TS5	1.0863
Achnanthes biasolettiana Grunow var.biasolettiana Grunow in Cleve & Grun.	Achnanthales	Achnanthaceae	TS5	1.0894
Achnanthes pyrenaica Hustedt	Achnanthales	Achnanthaceae	TS5	1.0894

## Sheet: Table S10
Taxa	Order	Family	Trait syndrome	Distance
Nemathelmintha			TS1	0.6830
Notostraca	Notostraca		TS1	1.0911
Glossiphoniidae	Hirudinida	Glossiphoniidae	TS1	1.1591
Piscicolidae	Rhynchobdellida	Piscicolidae	TS1	1.1613
Austropotamobius	Decapoda	Astacidae	TS1	1.3752
Planariidae	Tricladida	Planariidae	TS1	1.3876
Bryozoa			TS1	1.4929
Anodonta	Unionoida	Unionidae	TS1	1.7333
Unio	Unionoida	Unionidae	TS1	1.7408
Potomida	Unionoida	Unionidae	TS1	1.7585
Sympecma	Odonata	Lestidae	TS2	0.6959
Platycnemis	Odonata	Platycnemididae	TS2	0.7370
Calopteryx	Odonata	Calopterygidae	TS2	0.7618
Aeshna	Odonata	Aeshnidae	TS2	0.7639
Anax	Odonata	Aeshnidae	TS2	0.7810
Lestes	Odonata	Lestidae	TS2	0.7848
Coenagrionidae	Odonata	Coenagrionidae	TS2	0.8064
Chalcolestes	Odonata	Lestidae	TS2	0.8082
Hemianax	Odonata	Aeshnidae	TS2	0.8685
Epitheca	Odonata	Corduliidae	TS2	0.9055
Oligochaeta			TS3	0.6922
Bithynia	Littorinimorpha	Bithyniidae	TS3	0.7064
Lithoglyphus	Littorinimorpha	Lithoglyphidae	TS3	0.7862
Spercheus	Coleoptera	Spercheidae	TS3	0.8041
Acroloxus	Basommatophora	Acroloxidae	TS3	0.8462
Viviparus	Pulmonata	Viviparidae	TS3	0.8562
Prostoma	Hoplonemertea	Tetrastemmatidae	TS3	0.8971
Potamopyrgus	Littorinimorpha	Hydrobiidae	TS3	0.9083
Hydrophilinae	Coleoptera	Hydrophilidae	TS3	0.9302
Valvata	Heterostropha	Valvatidae	TS3	0.9461
Pisidium	Veneroida	Sphaeriidae	TS4	0.7386
Sphaerium	Veneroida	Sphaeriidae	TS4	0.7771
Corbicula	Veneroida	Corbiculidae	TS4	0.8620
Musculium	Veneroida	Sphaeriidae	TS4	0.8757
Dreissena	Veneroida	Dressenidae	TS4	0.9529
Jaera	Isopoda	Janiridae	TS4	1.0718
Dikerogammarus	Amphipoda	Gammaridae	TS4	1.1210
Echinogammarus	Amphipoda	Gammaridae	TS4	1.1963
Mysis	Mysida	Mysidae	TS4	1.2291
Corophium	Amphipoda	Corophiidae	TS4	1.2350
Chironomidae	Diptera	Chironomidae	TS5	0.3312
Limoniidae	Diptera	Limoniidae	TS5	0.4782
Centroptilum	Ephemeroptera	Baetidae	TS5	0.5022
Leptophlebia	Ephemeroptera	Leptophlebiidae	TS5	0.5301
Procloeon	Ephemeroptera	Baetidae	TS5	0.5771
Ceratopogonidae	Diptera	Ceratopogonidae	TS5	0.5784
Ptychopteridae	Diptera	Ptychopteridae	TS5	0.5898
Cloeon	Ephemeroptera	Baetidae	TS5	0.6050
Pseudocentroptilum	Ephemeroptera	Baetidae	TS5	0.6086
Caenis	Ephemeroptera	Caenidae	TS5	0.6149
Emmericia	Littorinimorpha	Emmericiidae	TS6	0.2773
Brachythemis	Odonata	Libellulidae	TS6	0.3450
Isonychia	Ephemeroptera	Isonychiidae	TS6	0.3577
Calamoceras	Trichoptera	Calamoceratidae	TS6	0.3995
Goera	Trichoptera	Goeridae	TS6	0.4074
Ceraclea	Trichoptera	Leptoceridae	TS6	0.4660
Capnia	Plecoptera	Capniidae	TS6	0.4677
Limnephilinae	Trichoptera	Limnephilidae	TS6	0.4738
Stratiomyidae	Diptera	Stratiomyiidae	TS6	0.4870
Sericostoma	Trichoptera	Sericostomatidae	TS6	0.4991
Helicopsyche	Trichoptera	Helicopsychidae	TS7	0.4424
Blephariceridae	Diptera	Blephariceridae	TS7	0.4615
Drusinae	Trichoptera	Limnephilidae	TS7	0.4949
Lithax	Trichoptera	Goeridae	TS7	0.5049
Thremma	Trichoptera	Uenoidae	TS7	0.5126
Silonella	Trichoptera	Goeridae	TS7	0.5173
Isoperla	Plecoptera	Perlodidae	TS7	0.5564
Siphonoperla	Plecoptera	Chloroperlidae	TS7	0.5759
Eubria	Coleoptera	Psephenidae	TS7	0.5921
Synagapetus	Trichoptera	Glossosomatidae	TS7	0.5937
Raptobaetopus	Ephemeroptera	Baetidae	TS8	0.3928
Euleuctra	Plecoptera	Leuctridae	TS8	0.4580
Baetis	Ephemeroptera	Baetidae	TS8	0.4671
Paraleptophlebia	Ephemeroptera	Leptophlebiidae	TS8	0.4685
Thraulus	Ephemeroptera	Leptophlebiidae	TS8	0.4725
Habroleptoides	Ephemeroptera	Leptophlebiidae	TS8	0.4868
Brachyptera	Plecoptera	Taeniopterygidae	TS8	0.4972
Ephemerella	Ephemeroptera	Ephemerellidae	TS8	0.5023
Siphlonurus	Ephemeroptera	Siphlonuridae	TS8	0.5037
Ecdyonurus	Ephemeroptera	Heptageniidae	TS8	0.5274

[truncated: 1 more sheets: Table S11]
